# Supplementary figures and images for: A database of plagioclase crystal preferred orientations (CPO) and microstructures – implications for CPO origin, strength, symmetry and seismic anisotropy in gabbroic rocks
Source: Copernicus journal article supplement (doi:10.5194/se-4-511-2013), 2013-12-18

# Southwest Indian Ridge, ODP Hole 735B (ODP Leg 176) (continued)

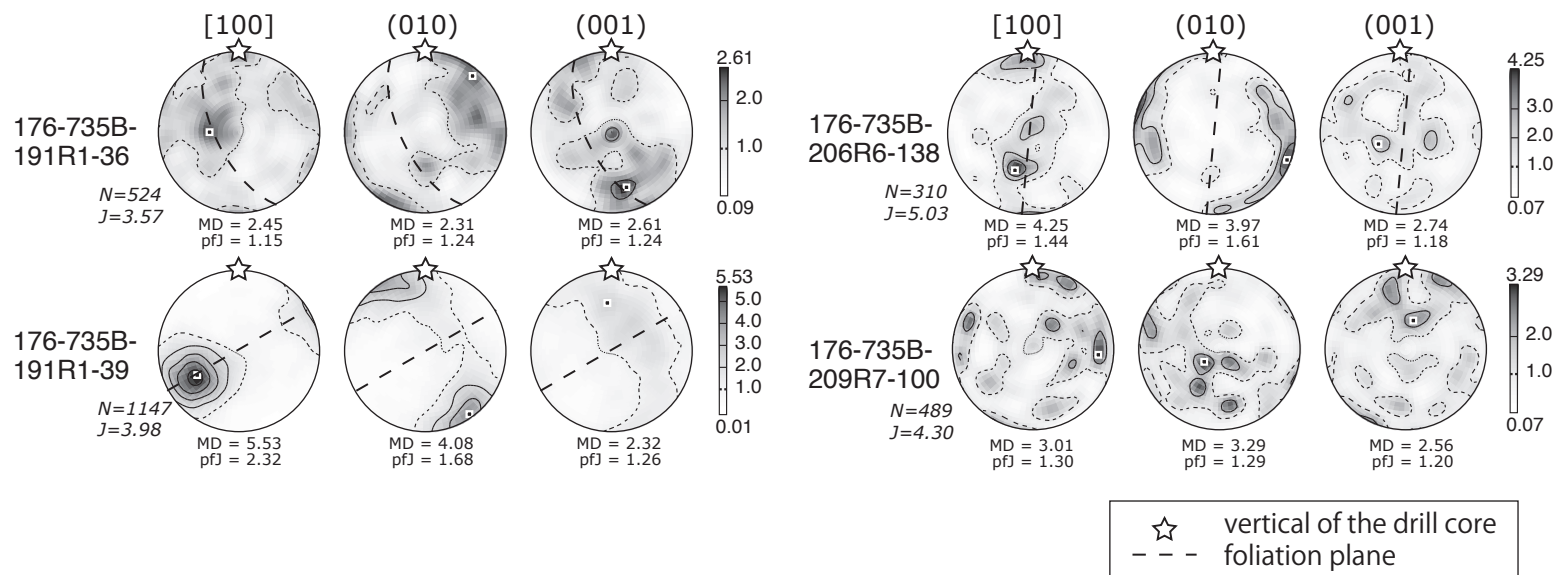

Supplement: Supplementary file 3 [file se-4-511-2013-supplement.zip]

# Oman ophiolite

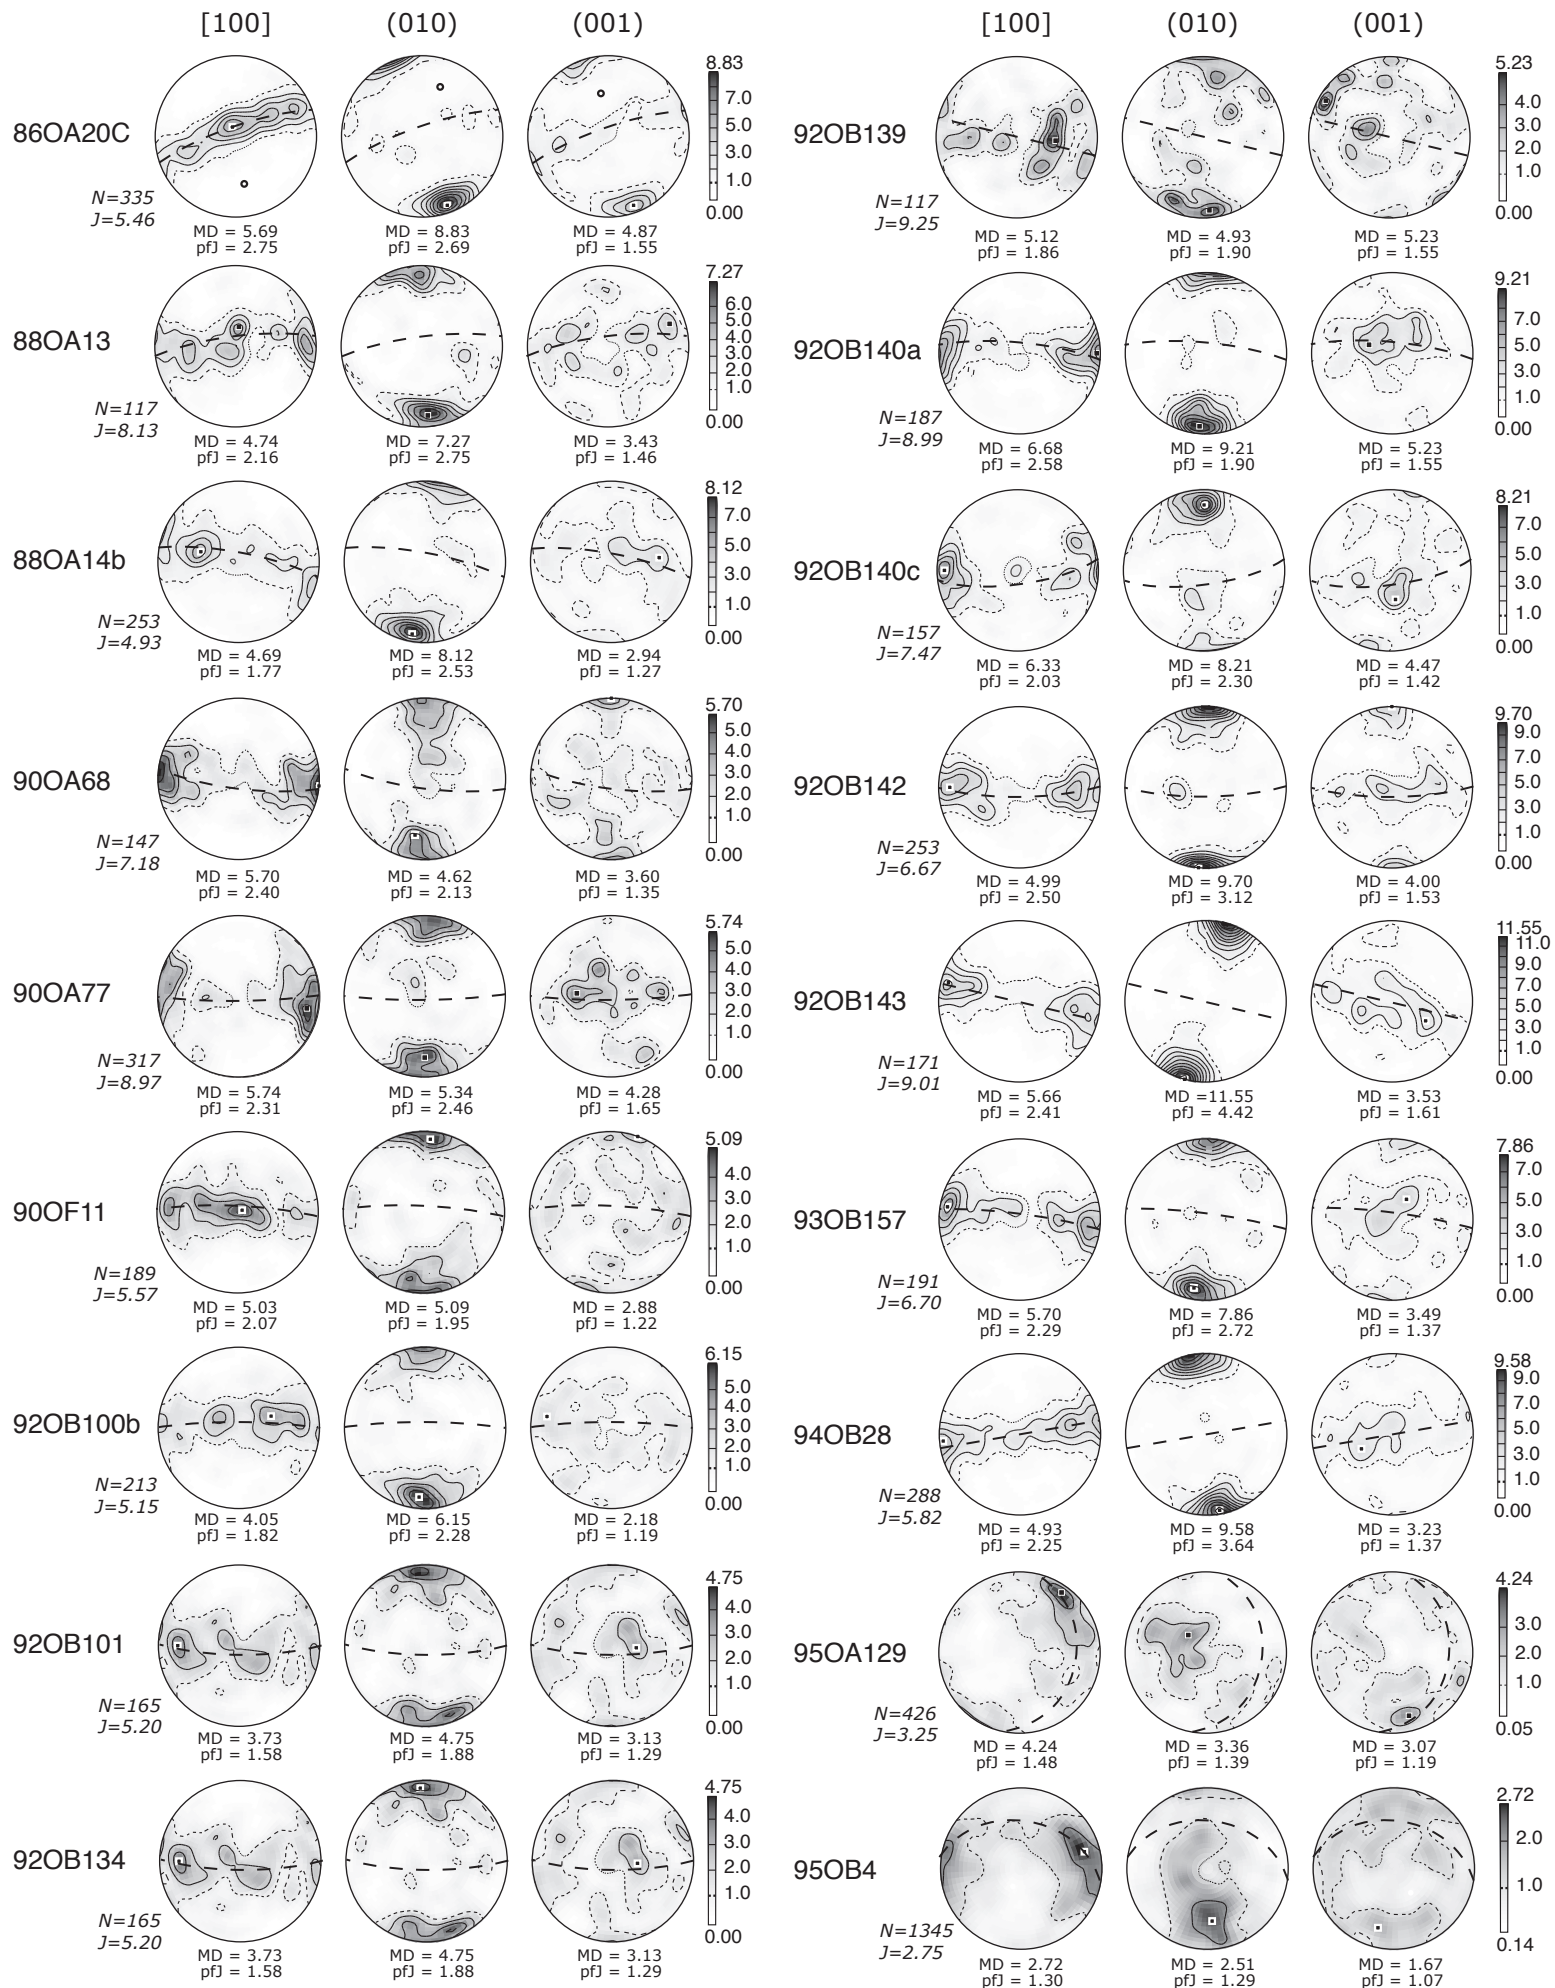

--- foliation plane

Supplement: Supplementary file 4 [file se-4-511-2013-supplement.zip]

# Southwest Indian Ridge, ODP Hole 735B (ODP Leg 176)

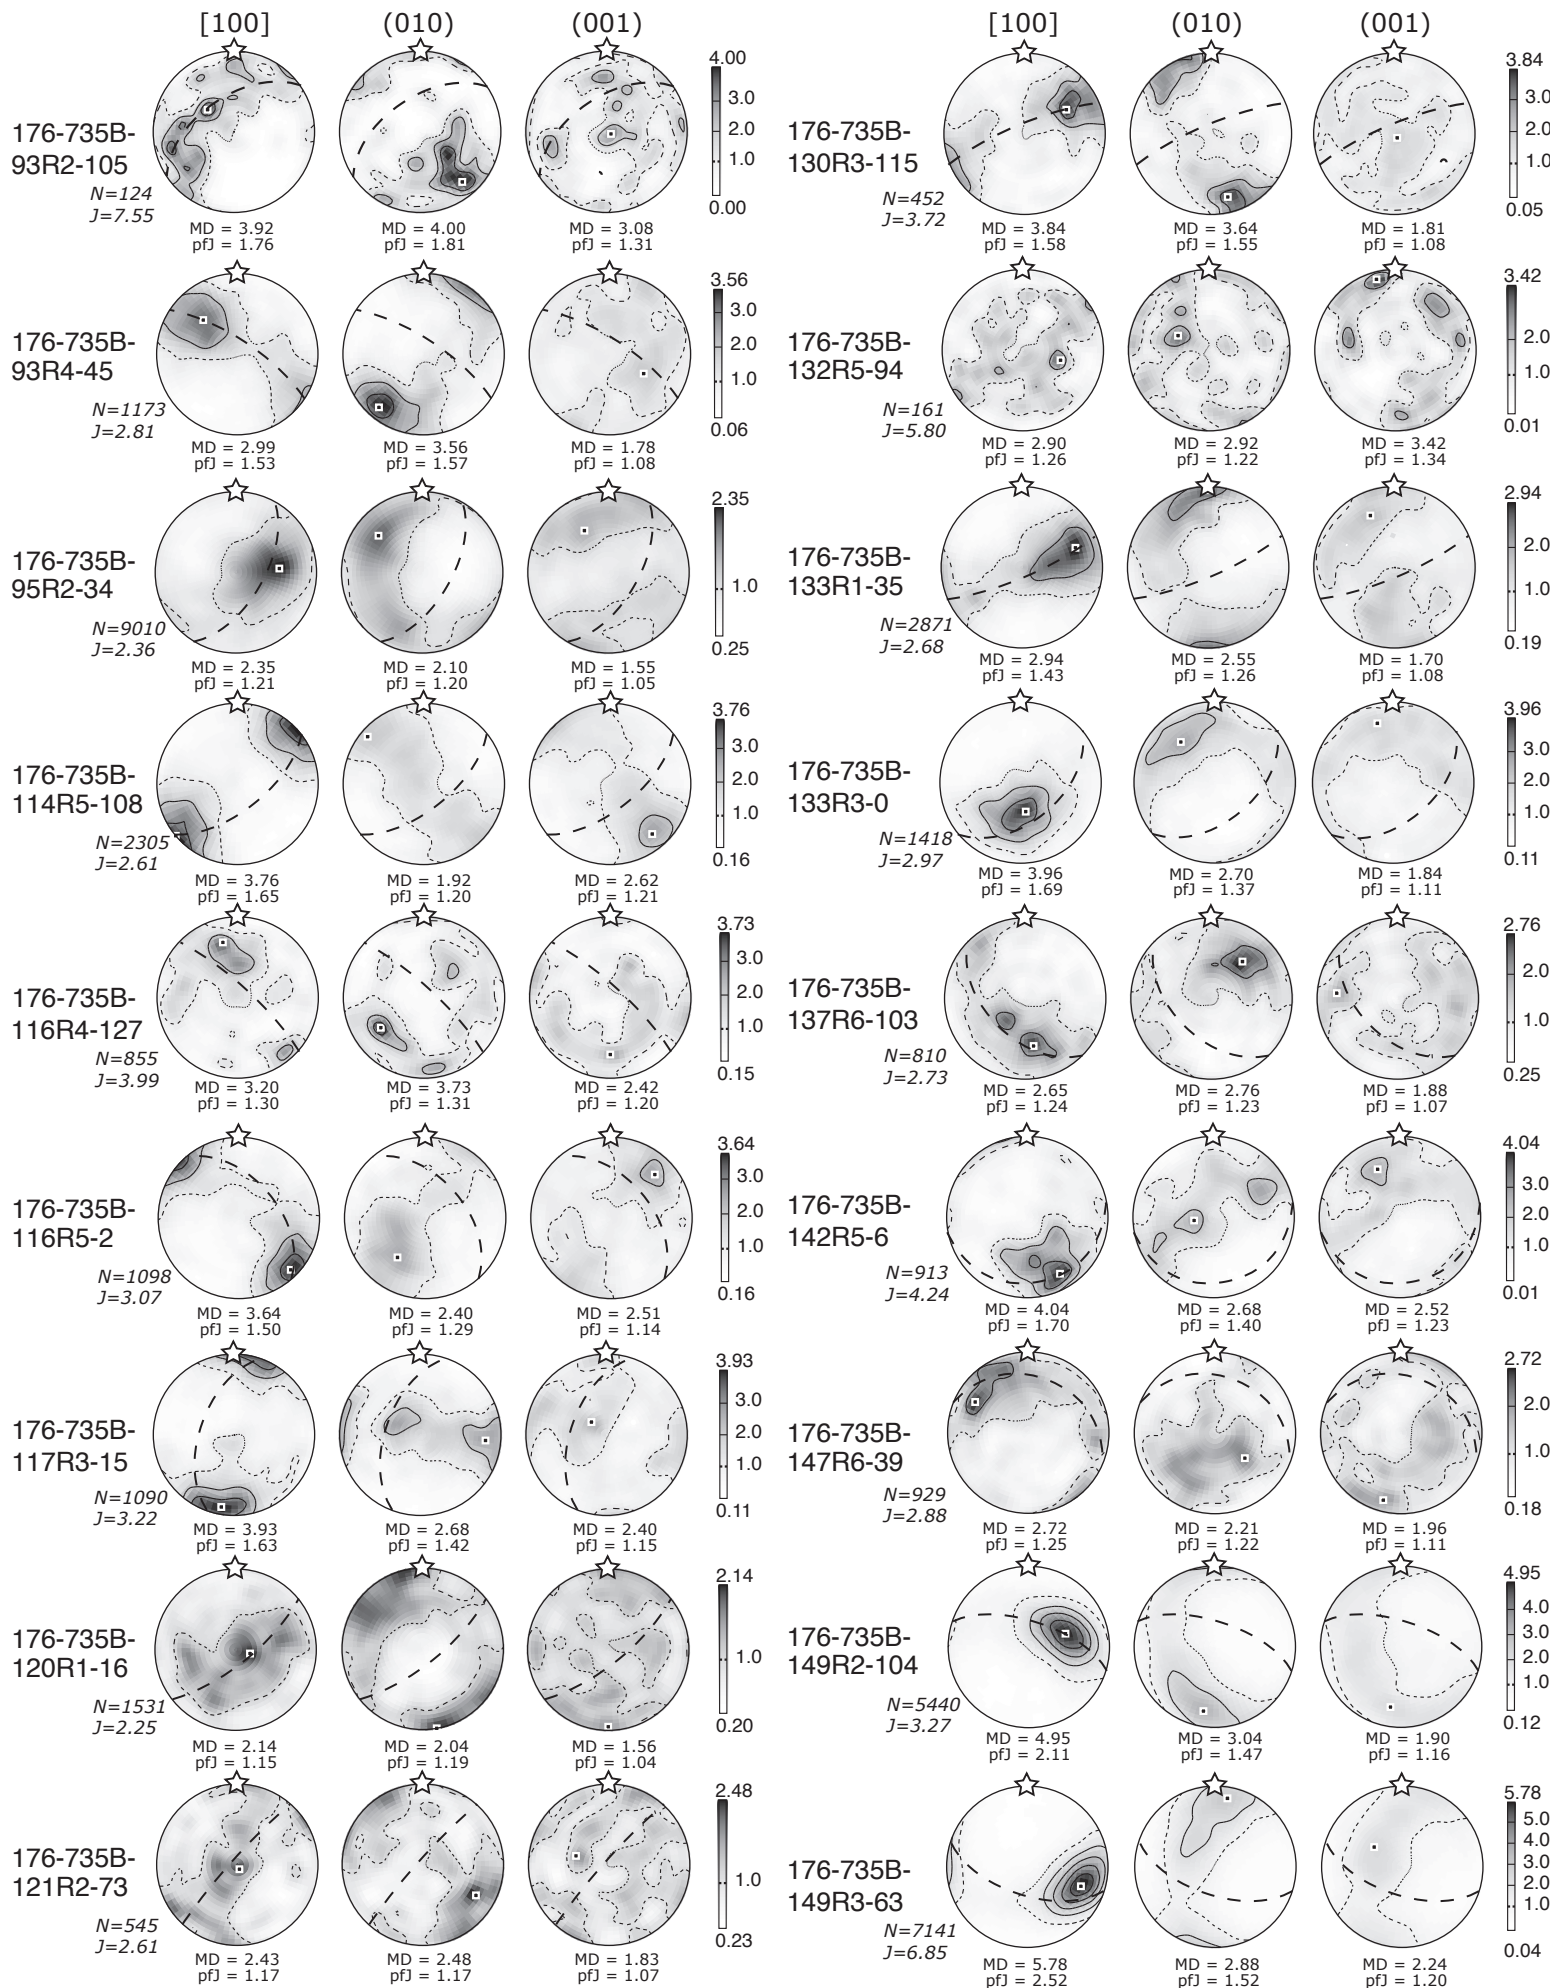

Supplement: Supplementary file 9 [file se-4-511-2013-supplement.zip]

## Mid Atlantic ridge, ODP Leg 209

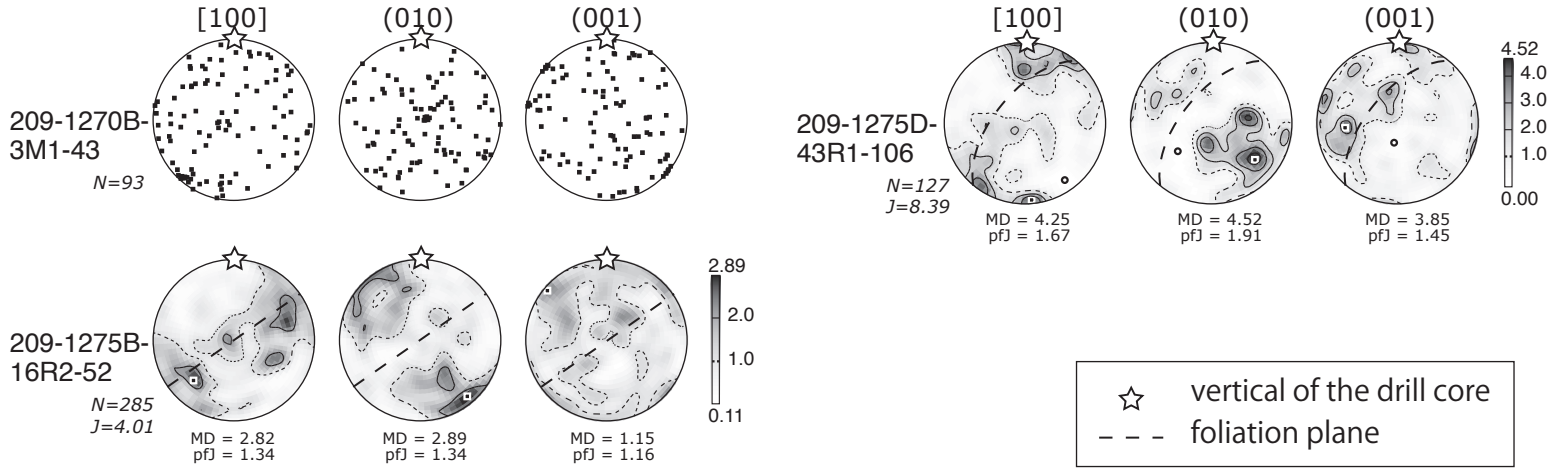

## La Réunion, Cirque de Salazie

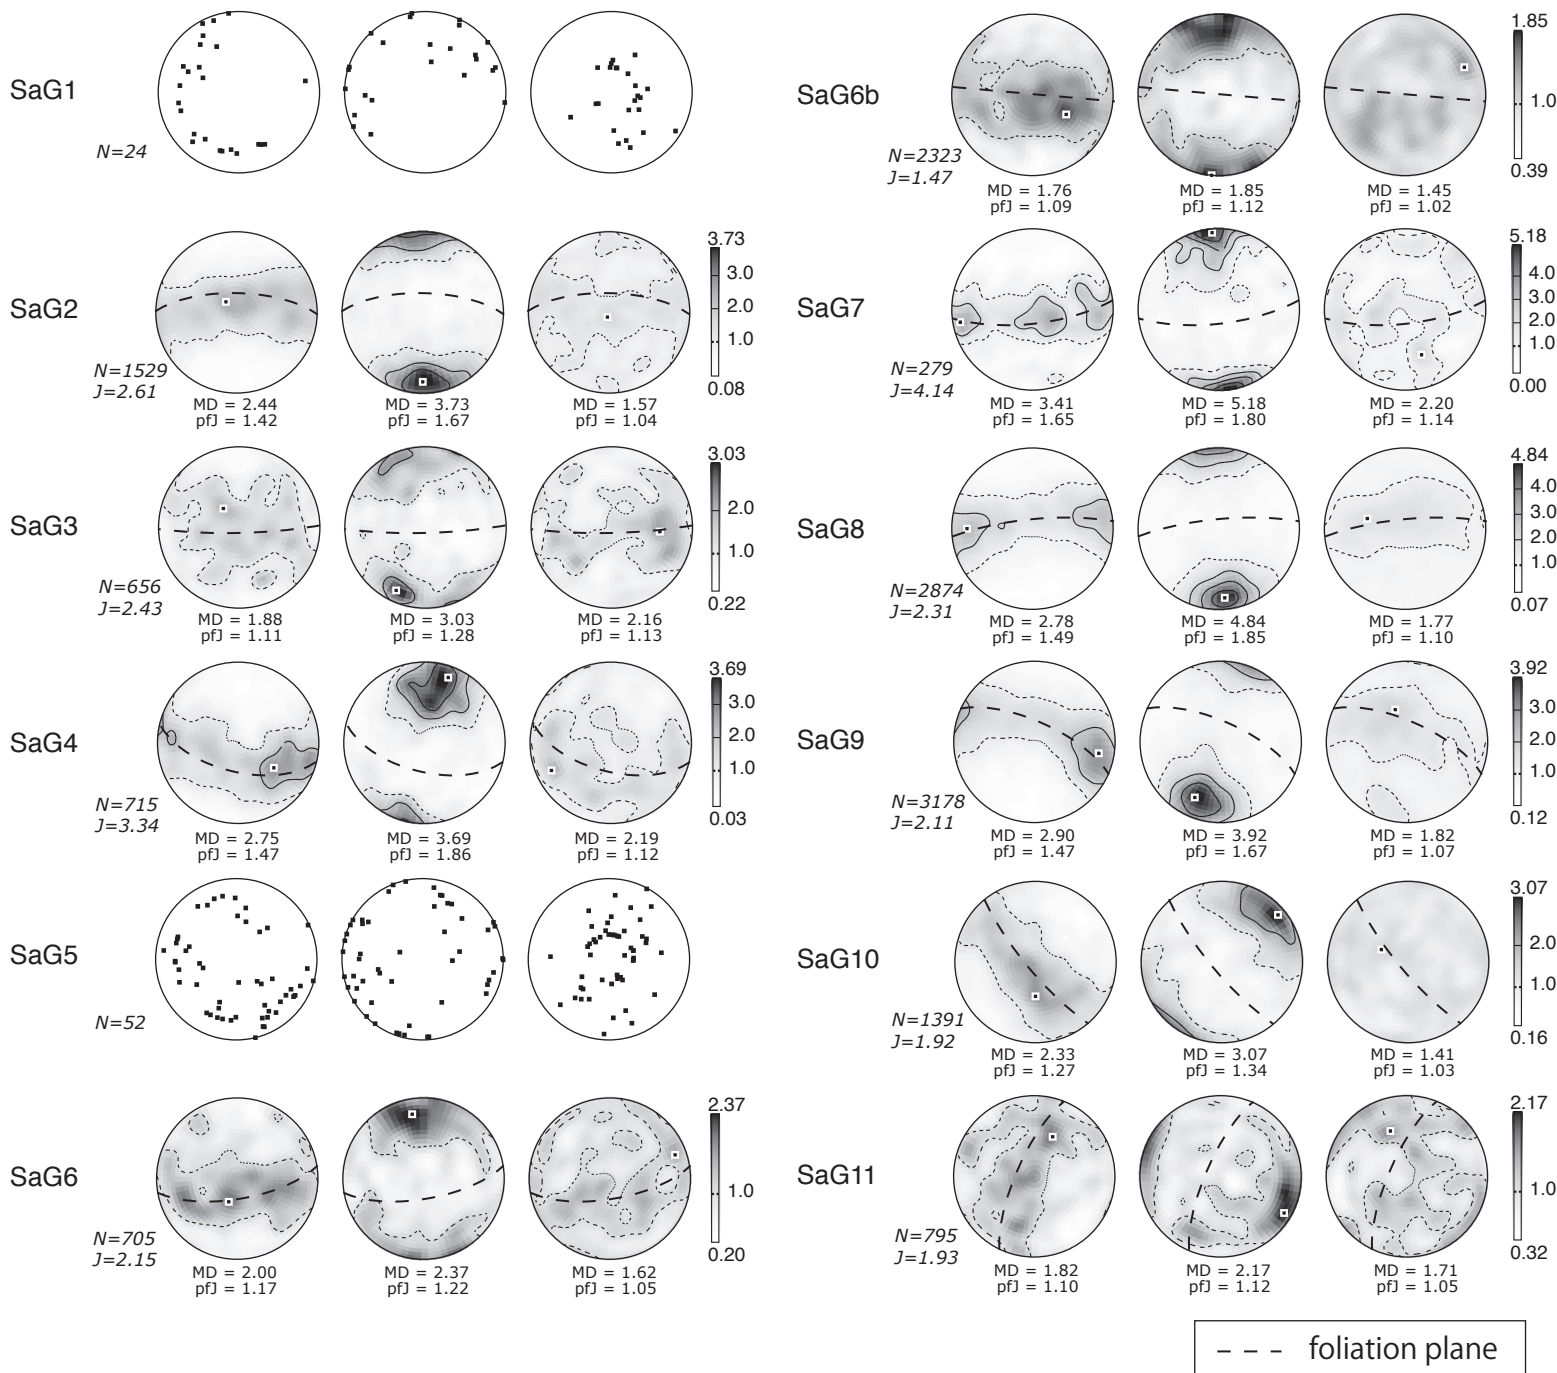

Supplement: Supplementary file 10 [file se-4-511-2013-supplement.zip]

# Hess Deep (East Pacific Rise)

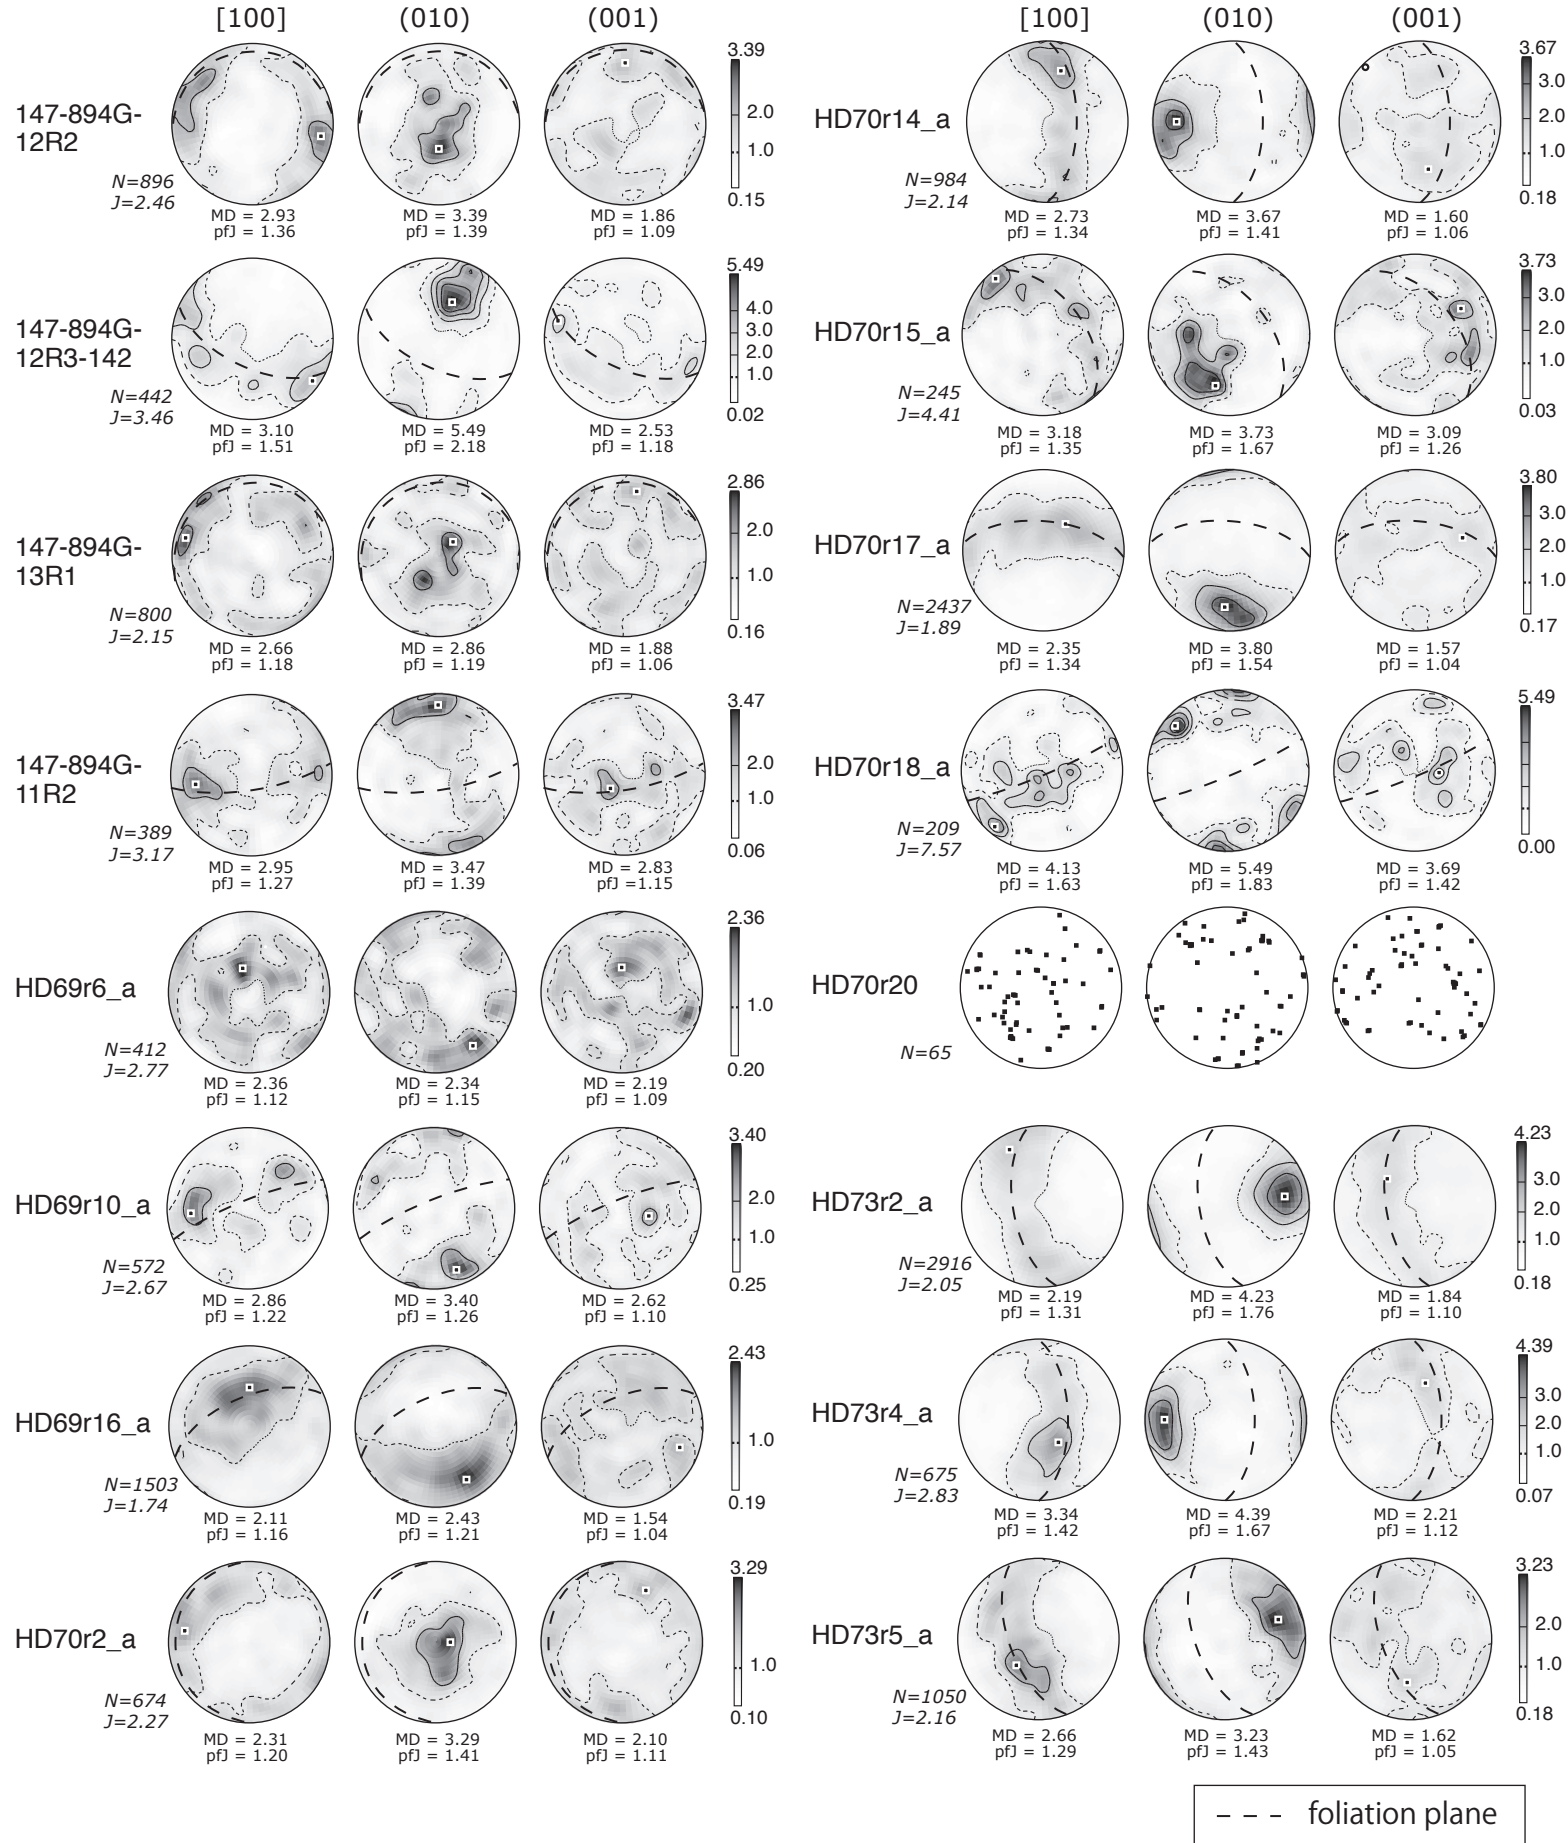

Supplement: Supplementary file 11 [file se-4-511-2013-supplement.zip]

# Oman ophiolite (continued)

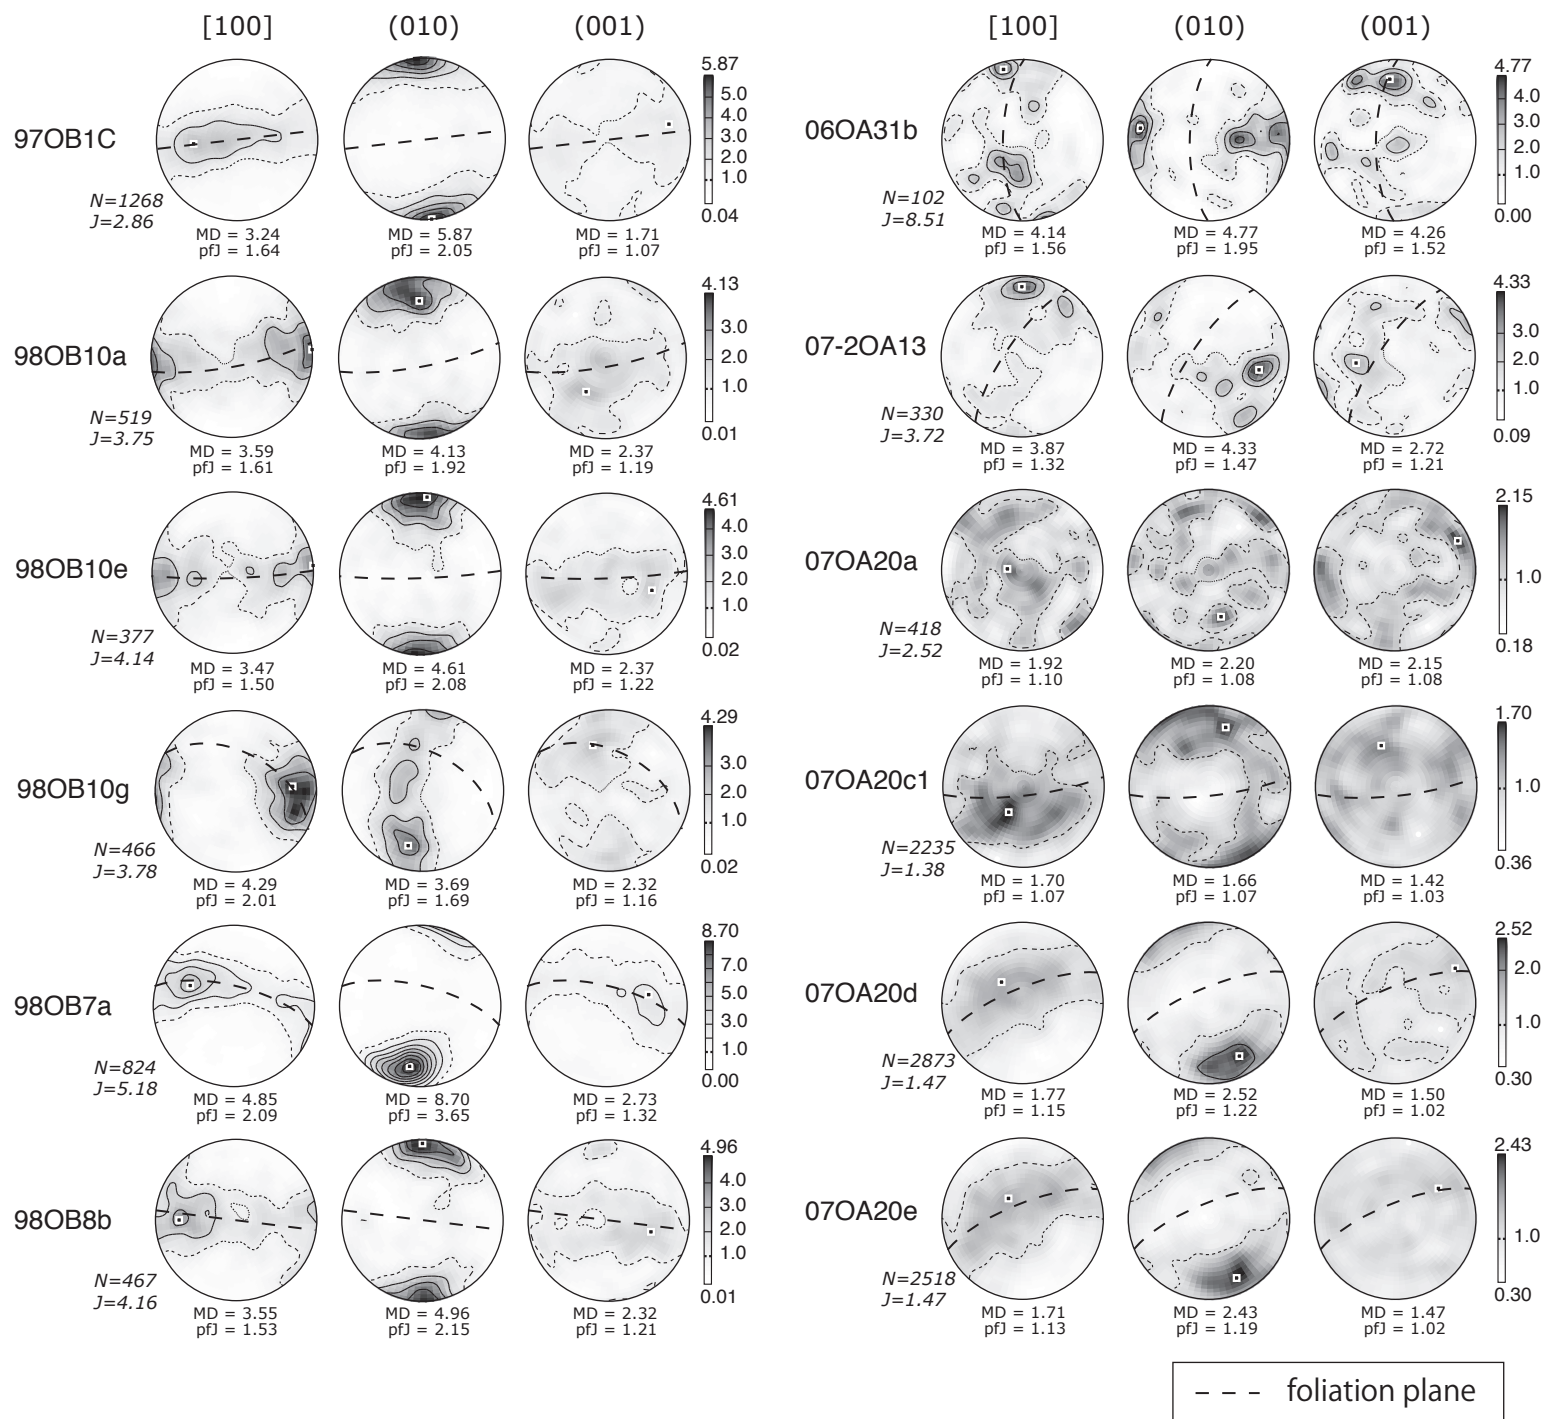

Supplement: Supplementary file 12 [file se-4-511-2013-supplement.zip]

# Brazil, Itabuna and Ribeira belts

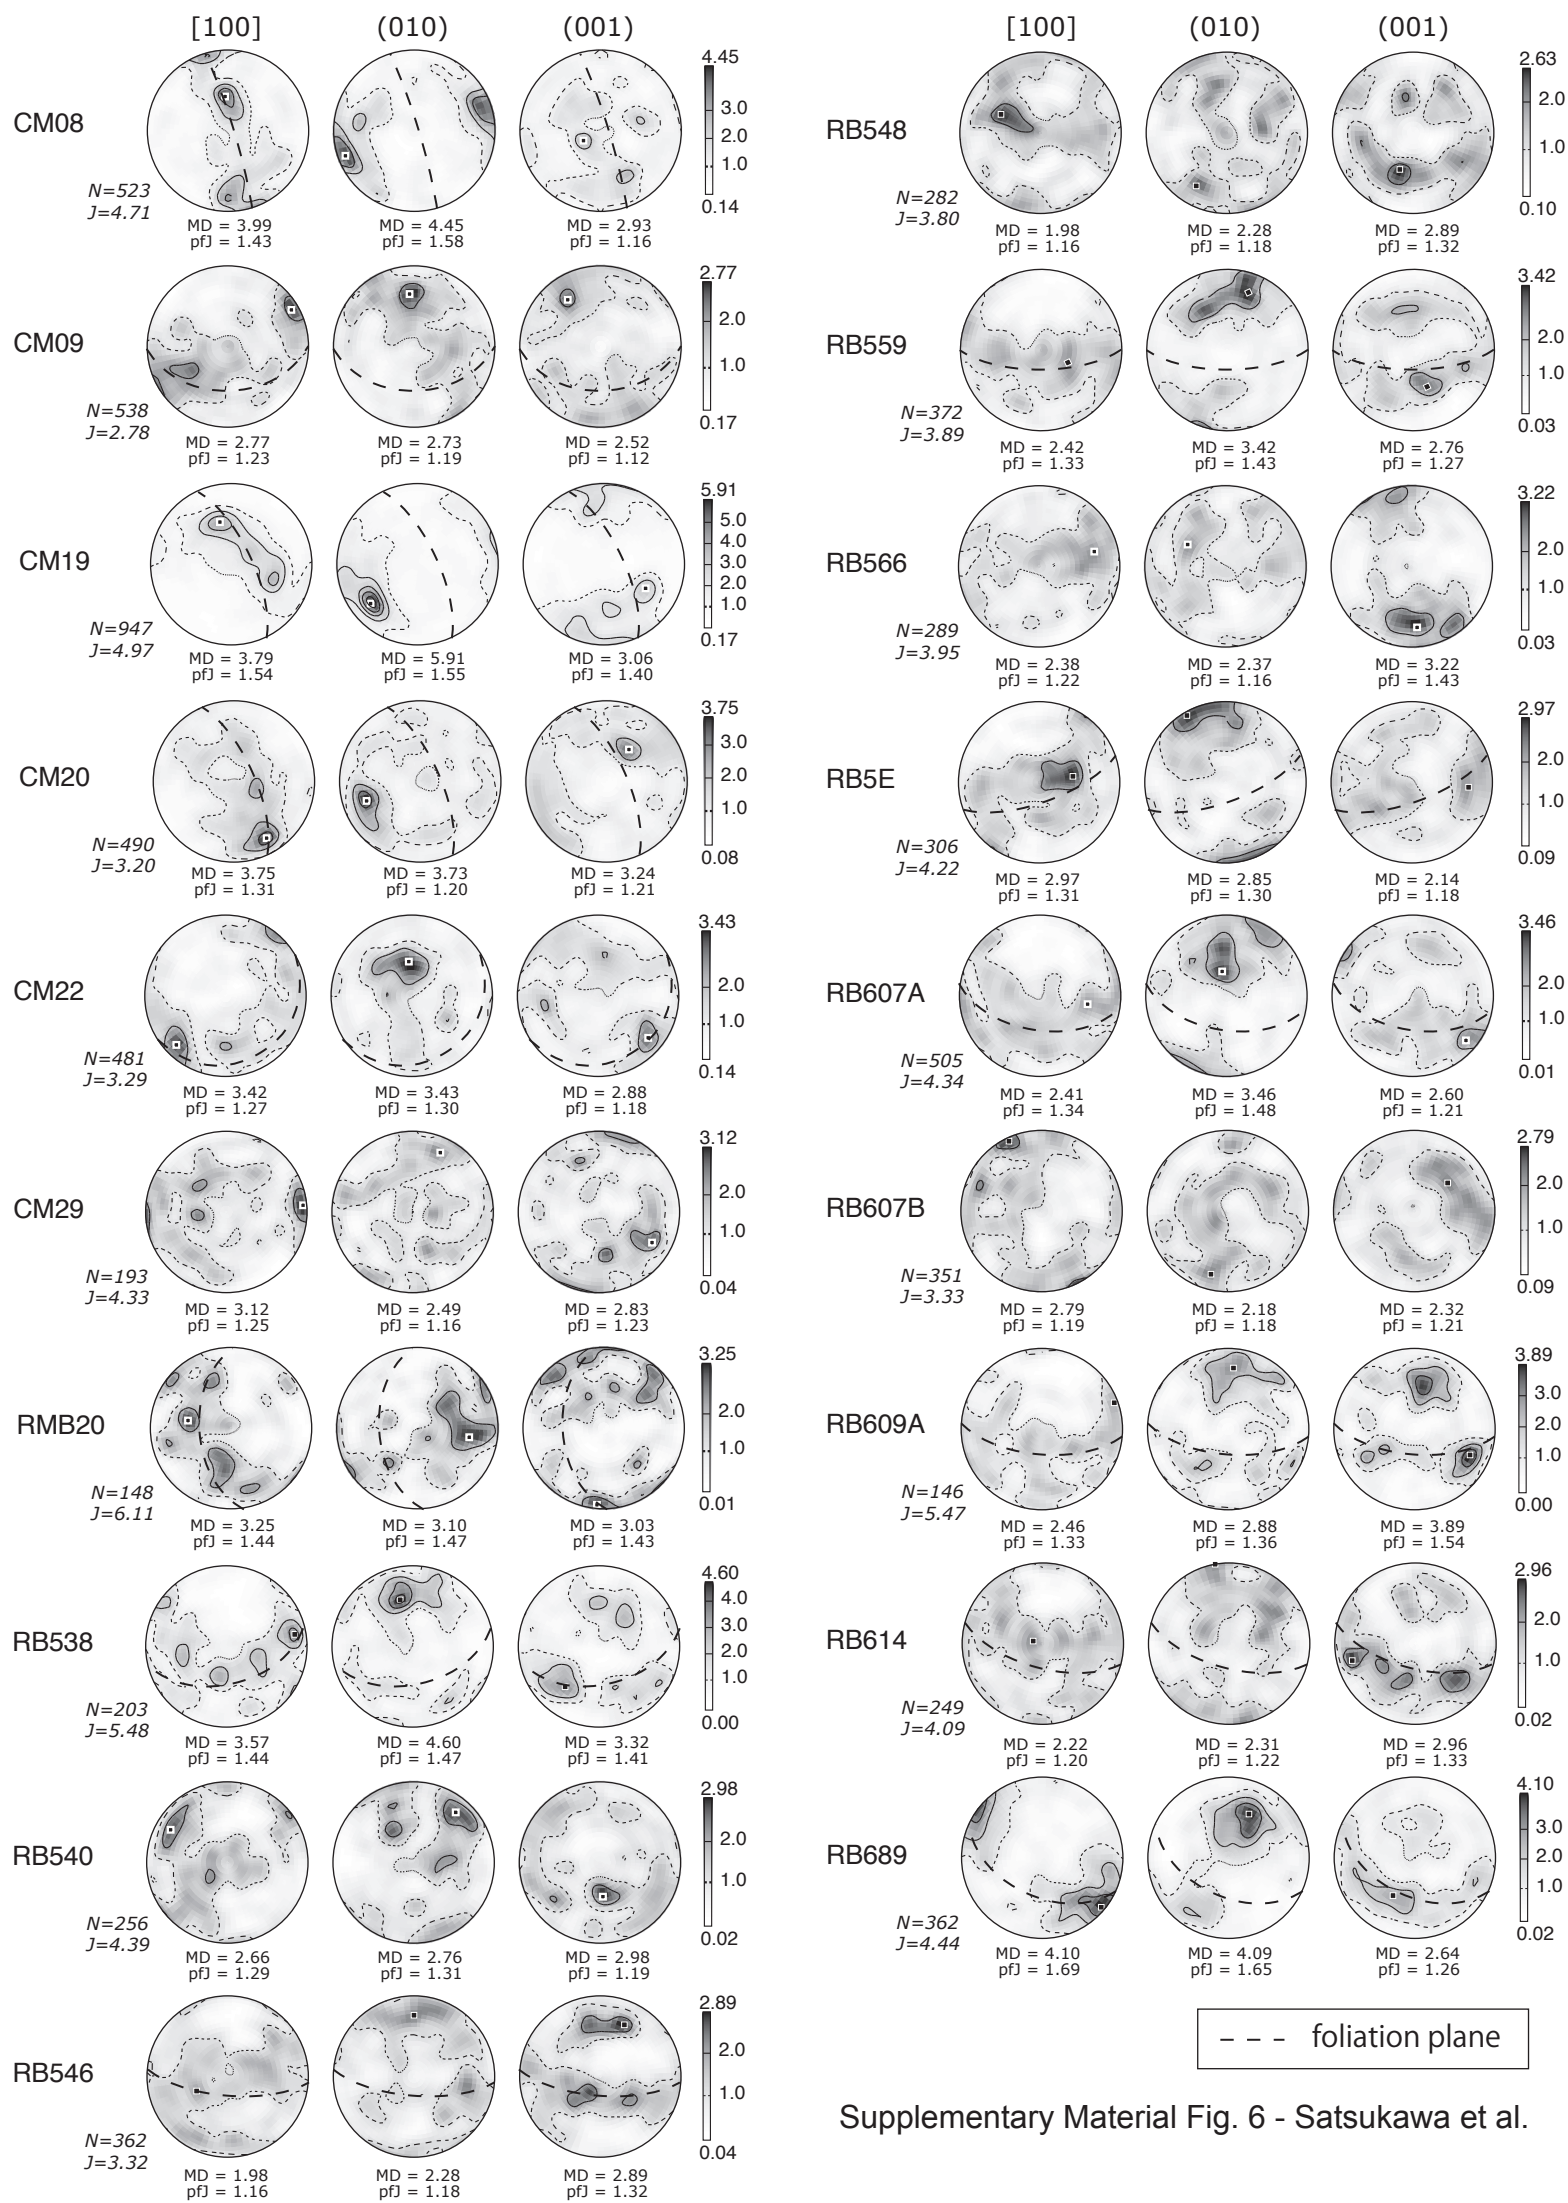

Supplement: Supplementary file 15 [file se-4-511-2013-supplement.zip]

# Cocos Plate (East-Pacific Rise), ODP Hole 1256D

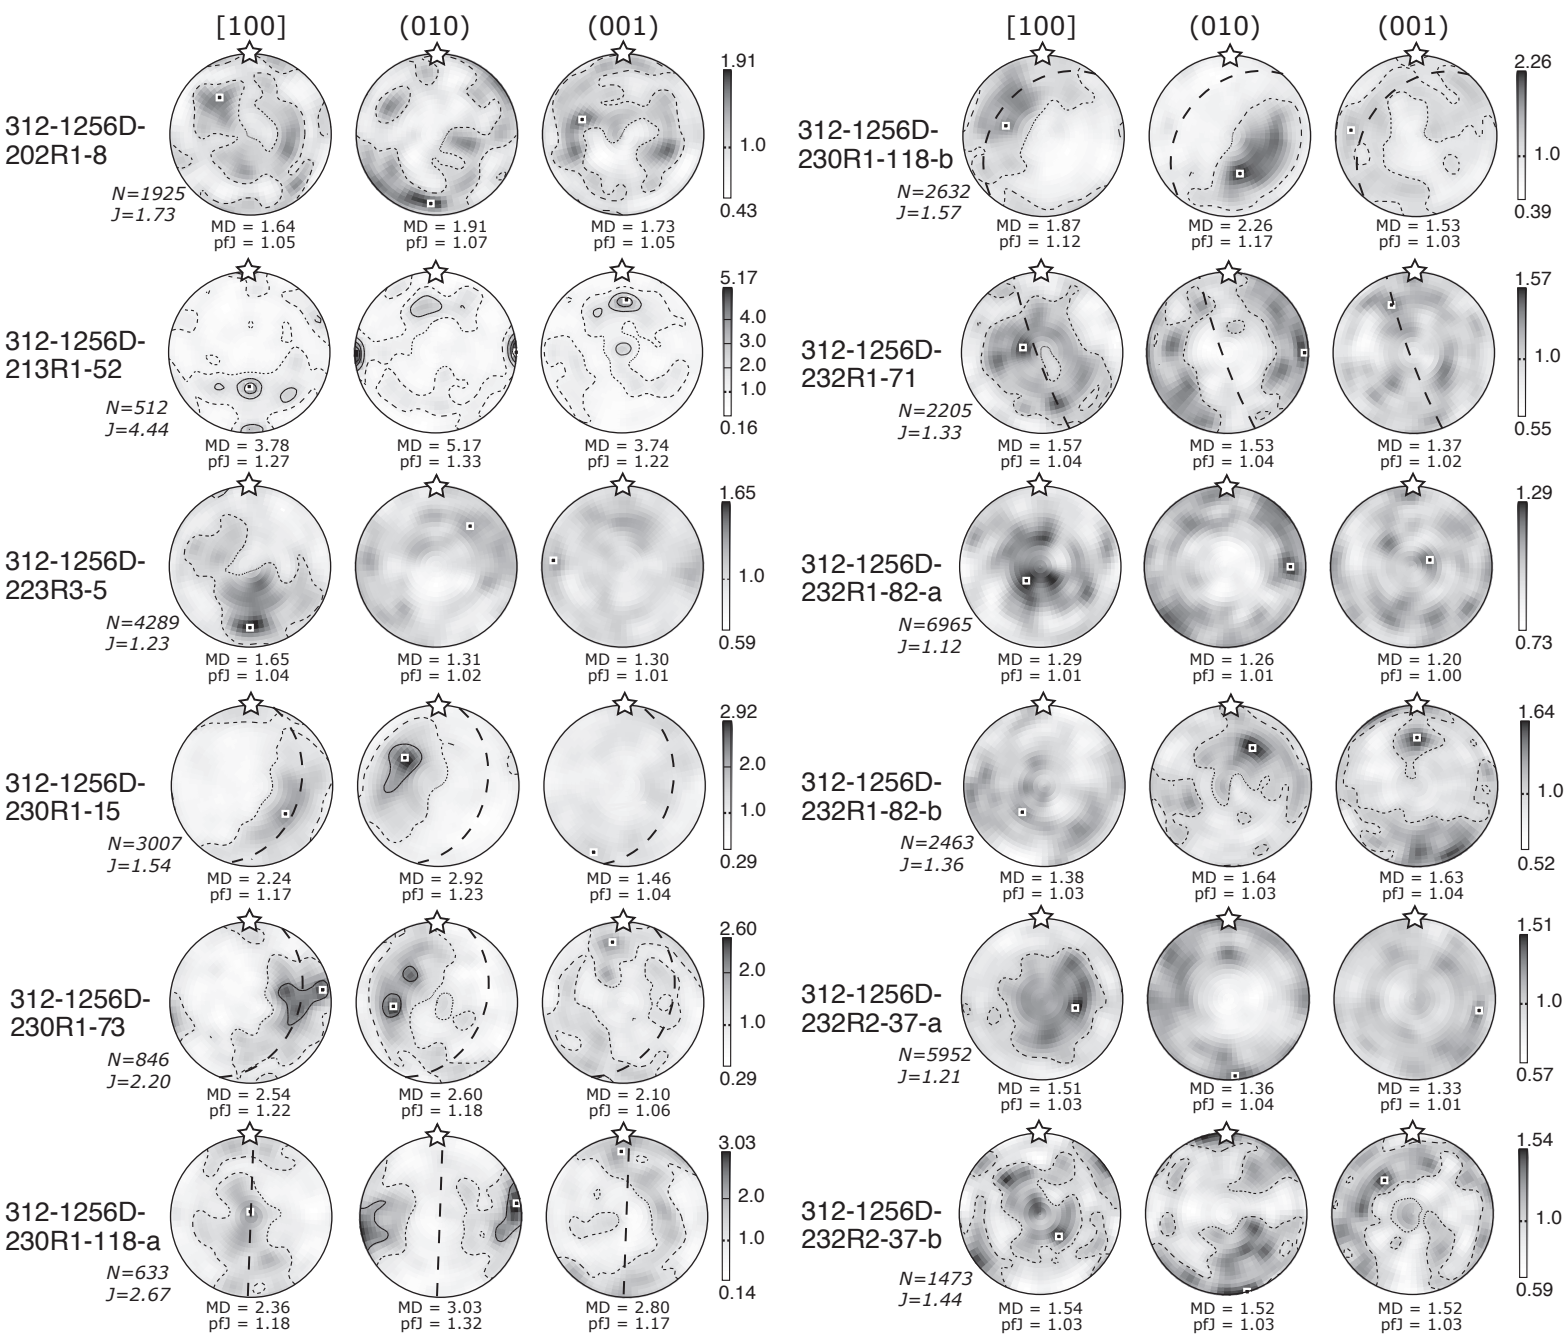

Supplement: Supplementary file 16 [file se-4-511-2013-supplement.zip]

## St. Thibéry lava flows

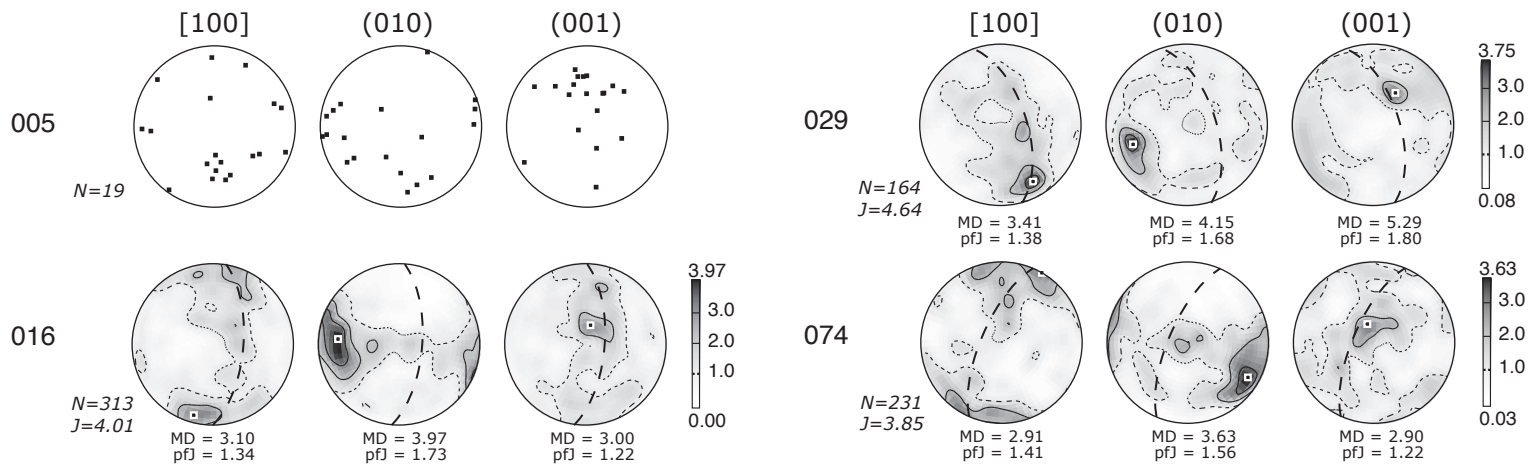

## Oklahoma anorthosite

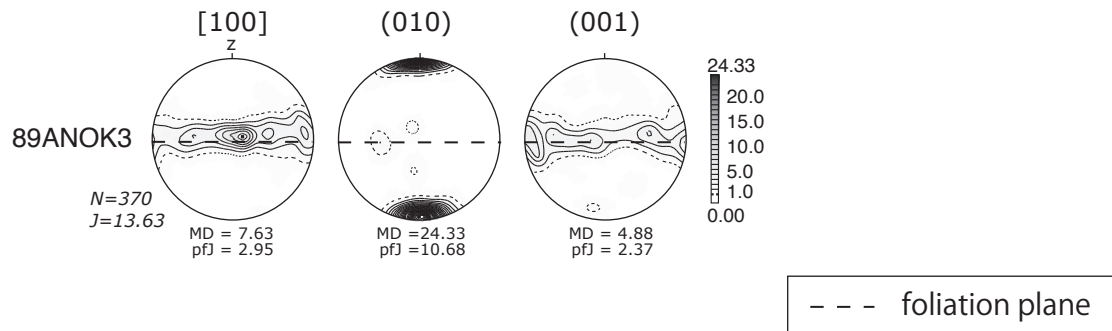

Supplement: Supplementary file 17 [file se-4-511-2013-supplement.zip]

# Hess Deep (East Pacific Rise) (continued)

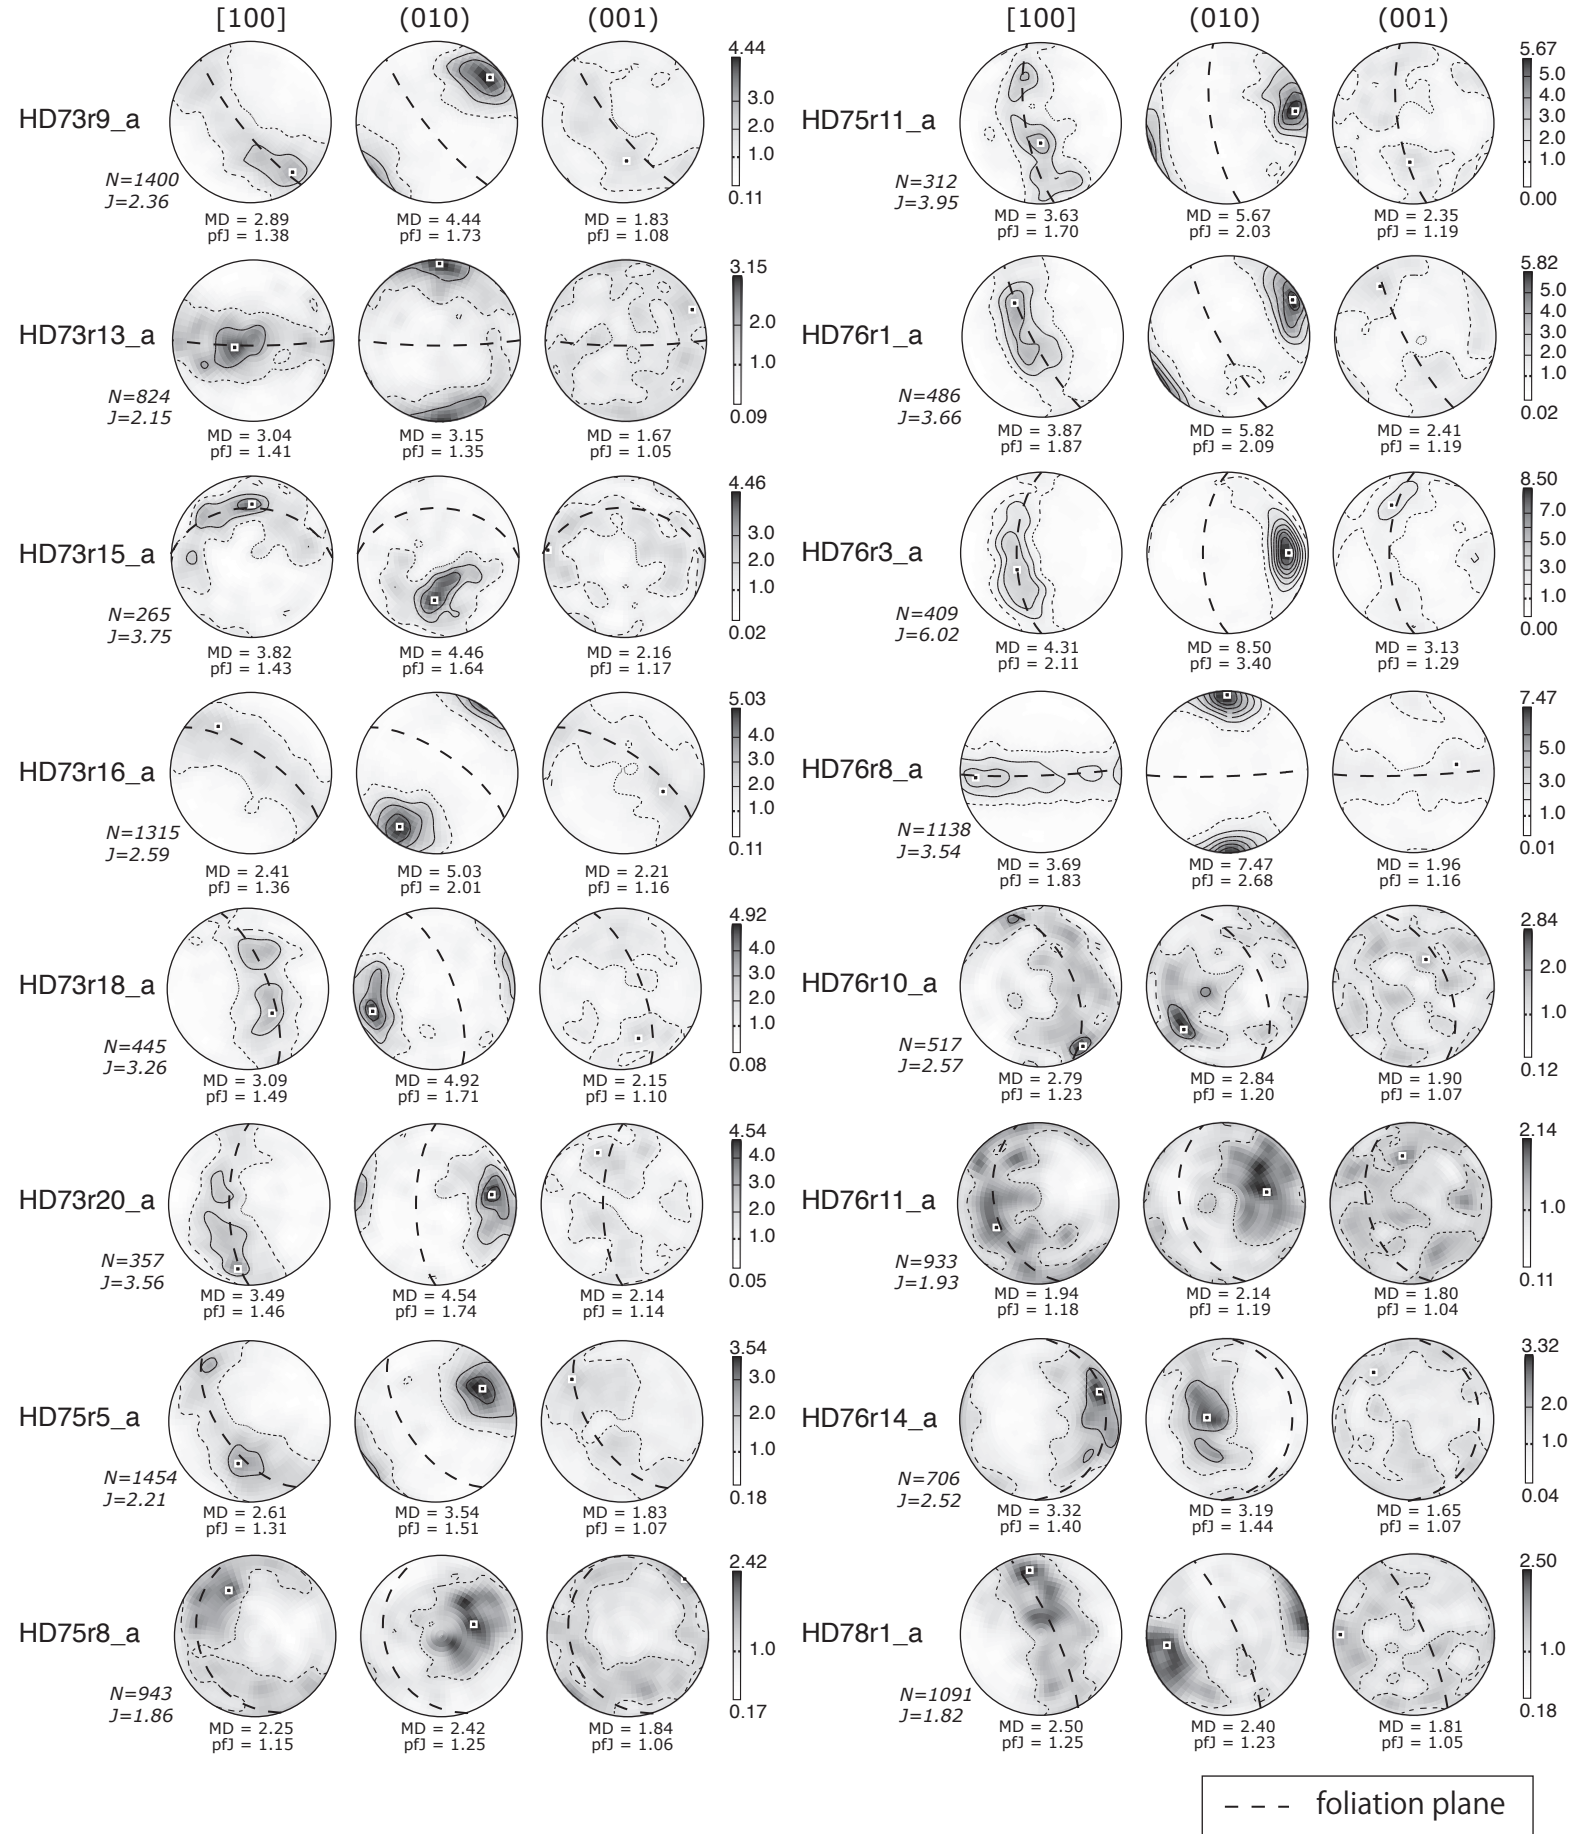

Supplement: Supplementary file 19 [file se-4-511-2013-supplement.zip]

# Hess Deep (East Pacific Rise) (continued)

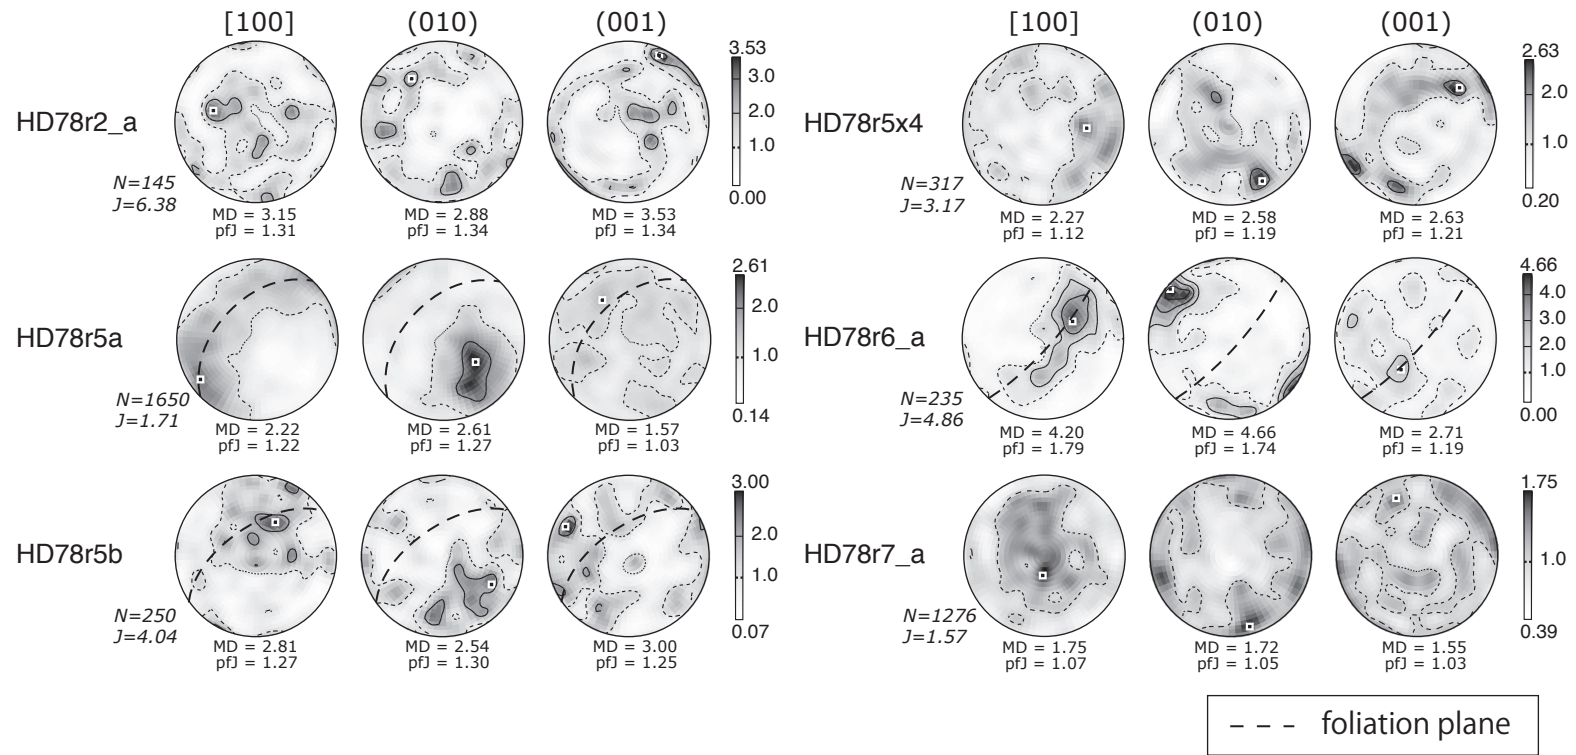

Supplement: Supplementary file 22 [file se-4-511-2013-supplement.zip]

# Southwest Indian Ridge, ODP Hole 735B (ODP Leg 176) (continued)

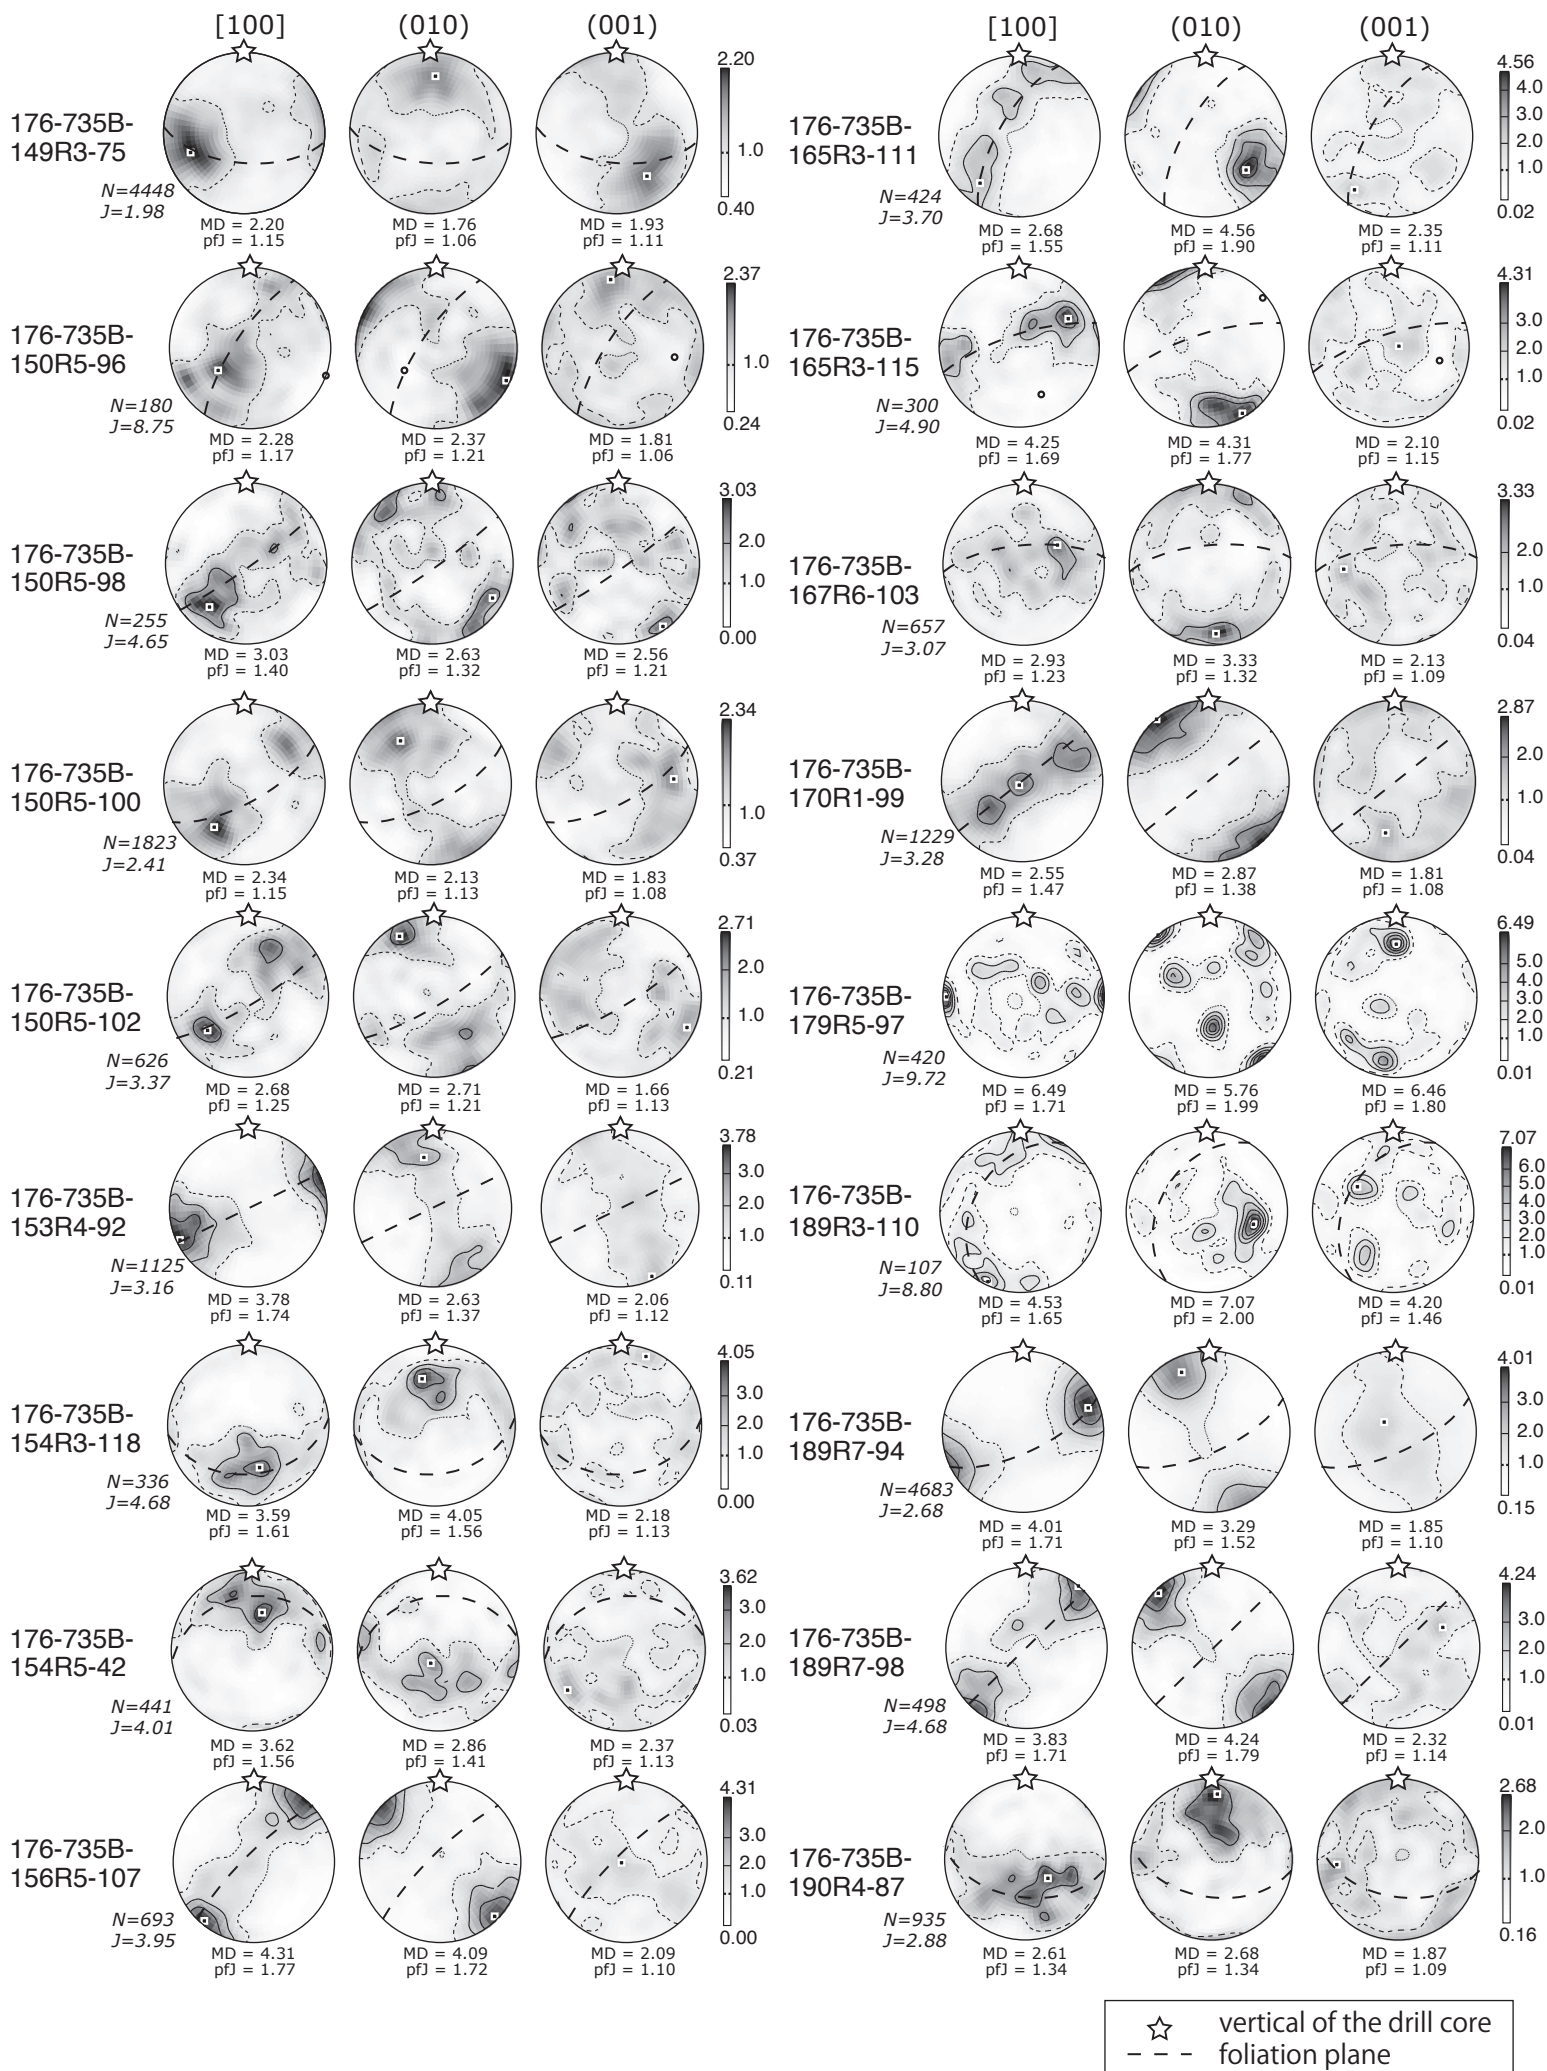

Supplement: Supplementary file 23 [file se-4-511-2013-supplement.zip]
